# Supplementary material for: A visible-light responsive zirconium metal–organic framework for living photopolymerization of methacrylates
Source: Royal Society of Chemistry journal article supplement (doi:10.1039/c6ra12134a), 2016-01-01
Supplement: c6ra12134a1.pdf [file c6ra12134a1.pdf]

## Supporting Information

### **Visible-light responsive zirconium metal-organic framework for living photopolymerization of methacrylates**

Hongzhu Xing,\* Dashu Chen, Xingyu Li, Yue Liu, Chungang Wang and Zhongmin Su\*

Provincial Key Laboratory of Advanced Energy Materials, College of Chemistry, Northeast  
Normal University, Changchun 130024, China

#### **Captions:**

Fig. S1 The PXRD patterns of NNU-28 under different conditions.

Fig. S2 The normalized SPV spectra of NNU-28 and the ligand in the solid state.

Fig. S3 The UV-vis spectrum of reaction mixtures without NNU-28.

Fig. S4 The fluorescence quenching of NNU-28 by Cu(II)/PMDETA complex.

Fig. S5 The recycling of NNU-28 for photopolymerization under 520 nm.

Fig. S6 The FT-IR spectrum of NNU-28.

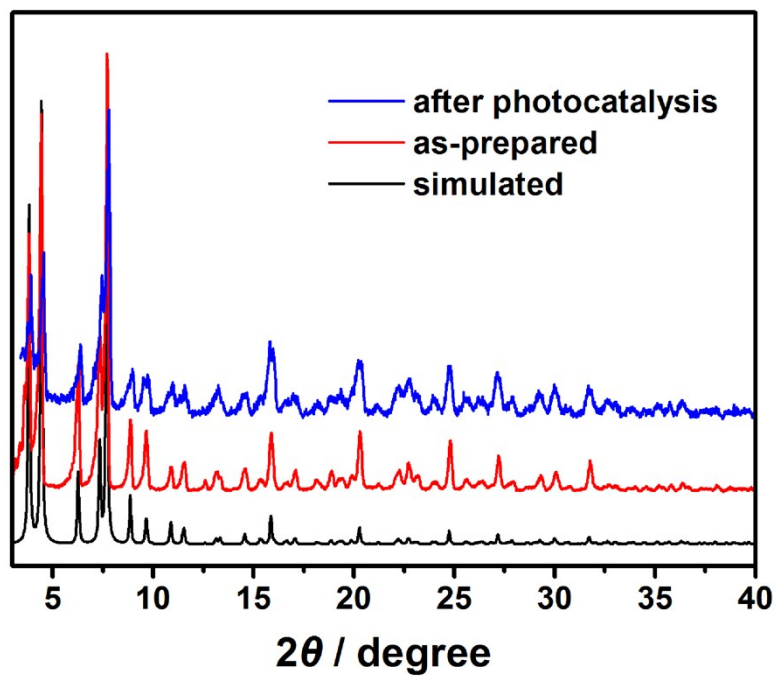

**Fig. S1** The PXRD patterns of NNU-28 under different conditions.

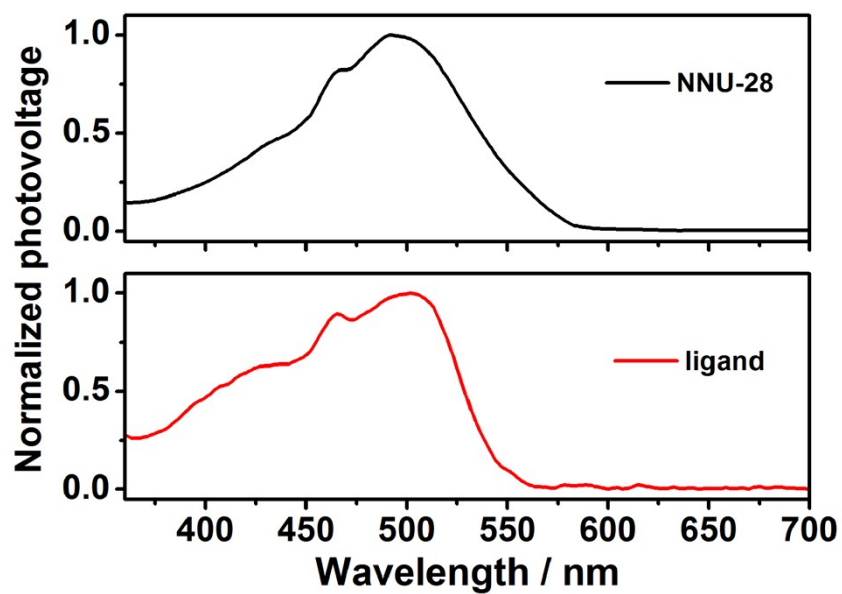

**Fig. S2** The normalized SPV spectra of NNU-28 and the ligand in the solid state.

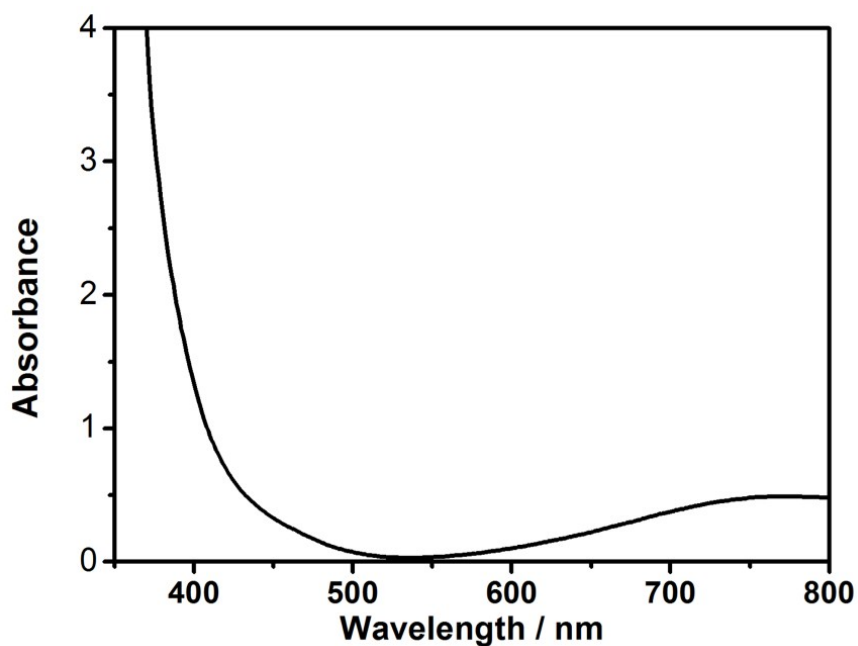

**Fig. S3** The UV-vis spectrum of reaction mixtures without NNU-28.

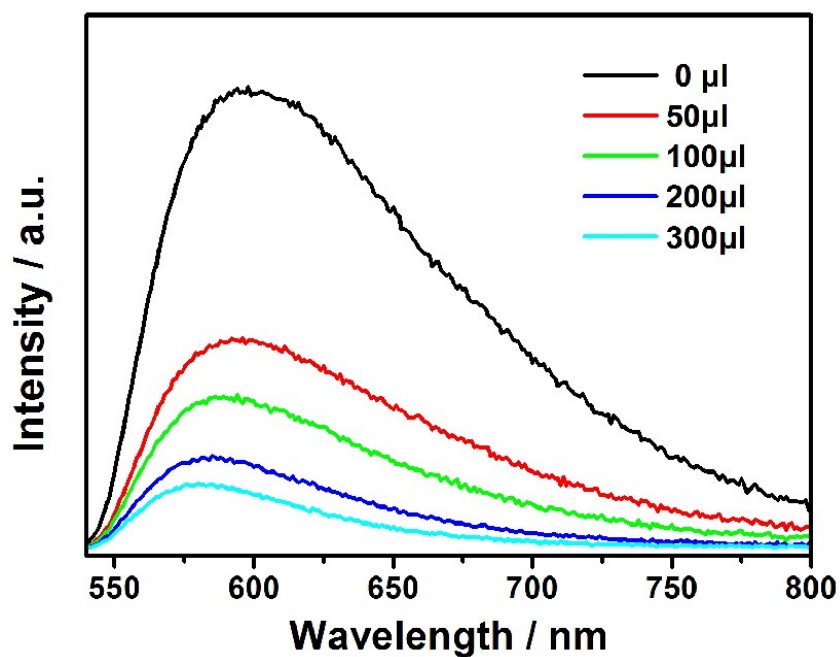

**Fig. S4.** The fluorescence of NNU-28 dispersed in acetonitrile (excited at 520 nm) quenched by Cu(II)/PMDETA complex. (The concentration of copper complex is 0.168 mmol/ml, and the titration amount of copper complex is 0 $\mu\text{l}$ , 50 $\mu\text{l}$ , 100 $\mu\text{l}$ , 200 $\mu\text{l}$  and 300 $\mu\text{l}$ , respectively.)

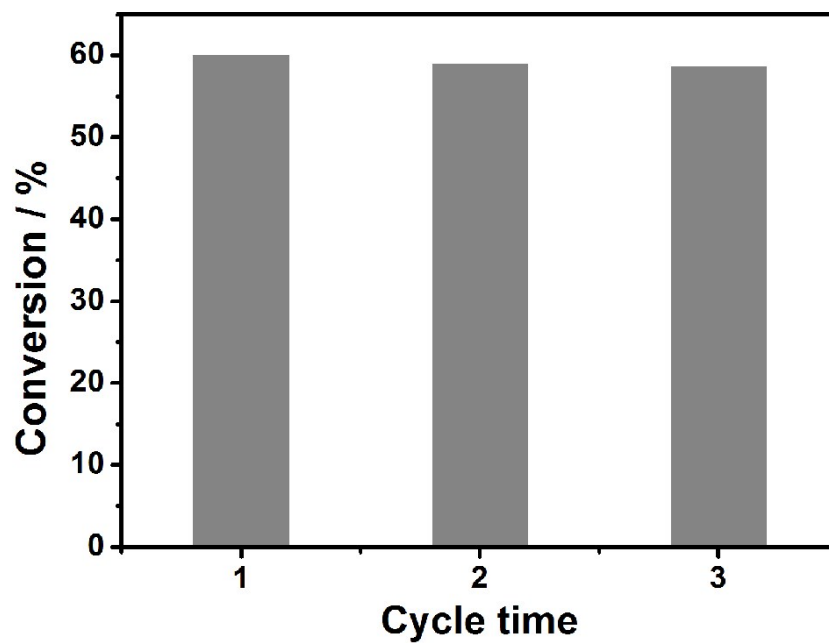

**Fig. S5** The recycling of NNU-28 for photopolymerization under 520 nm (irradiation time = 15 h).

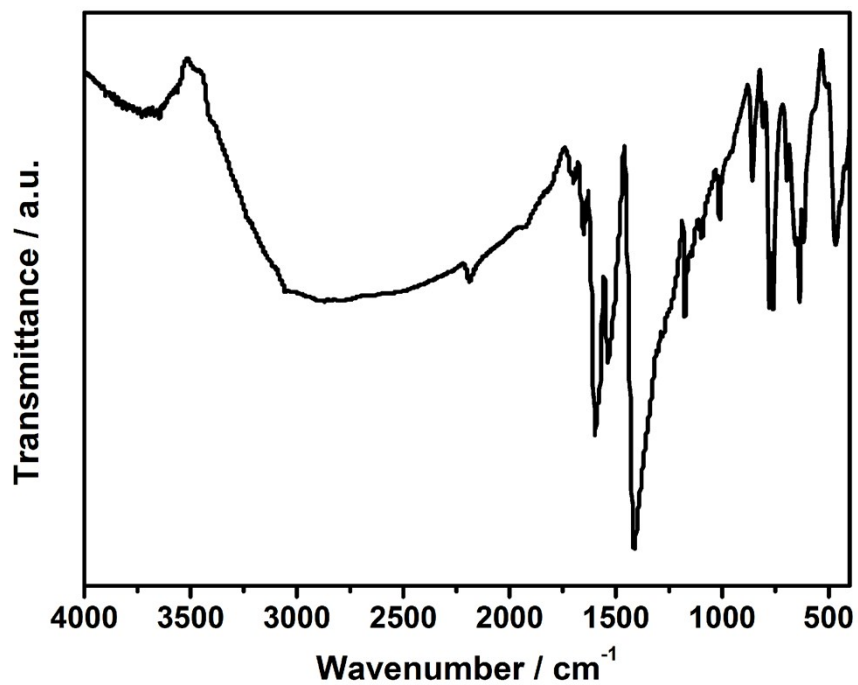

**Fig. S6** The FT-IR spectrum of NNU-28.
